# Supplementary material for: The Met Office Unified Model Global Atmosphere 7.0/7.1 and JULES Global Land 7.0 configurations
Source: Copernicus journal article supplement (doi:10.5194/gmd-2017-291), 2017-11-28
Supplement: Supplementary file 1 [file gmd-2017-291-supplement.pdf]

Supplementary material to: “*The Met Office Unified Model  
Global Atmosphere 7.0/7.1 and JULES Global Land 7.0  
configurations*”, submitted to Geosci. Model Dev.

David Walters et al.

Met Office, FitzRoy Road, Exeter, EX1 3PB, UK

November 15, 2017

## Contents

|          |                                                                   |          |
|----------|-------------------------------------------------------------------|----------|
| <b>1</b> | <b>Introduction</b>                                               | <b>1</b> |
| <b>2</b> | <b>GA7.0 settings that vary with global horizontal resolution</b> | <b>2</b> |
| <b>3</b> | <b>GA7.0 settings that vary with vertical resolution</b>          | <b>2</b> |
| 3.1      | UM settings to change with level set . . . . .                    | 2        |
| 3.2      | Details of vertical level sets . . . . .                          | 2        |
| <b>4</b> | <b>Namelist differences between GA7.0 and GA7.1</b>               | <b>5</b> |
| <b>5</b> | <b>Settings that may vary with system/application</b>             | <b>5</b> |
| <b>6</b> | <b>Example Rose/UM namelists for GA7.0/GL7.0</b>                  | <b>7</b> |
| 6.1      | N216 atmosphere/land-only climate . . . . .                       | 7        |

## 1 Introduction

This supplementary material to the main paper is designed to help users of GA7.0/7.1 and GL7.0 in configuring their systems to correctly implement the new configurations.

## 2 GA7.0 settings that vary with global horizontal resolution

Table 1 lists the Unified Model (UM) settings (as set in the Rose suite applications - see the Rose documentation at <http://metomi.github.io/rose/doc/rose.html>) that should be changed when changing horizontal resolution. The settings listed here are valid for UM code base vn10.6. The resolutions supported span from N96 ( $\approx 135$  km in the mid-latitudes) to N1280 ( $\approx 10$  km in the mid-latitudes).

| namelist<br>entry     | N96  | N216 | N320 | N400 | N512 | N768 | N1024 | N1280 |
|-----------------------|------|------|------|------|------|------|-------|-------|
| [namelist:nlsizes]    |      |      |      |      |      |      |       |       |
| global_row_length     | 192  | 432  | 640  | 800  | 1024 | 1536 | 2048  | 1560  |
| global_rows           | 144  | 324  | 480  | 600  | 768  | 1152 | 1536  | 1280  |
| [namelist:nlst_mpp]   |      |      |      |      |      |      |       |       |
| extended_halo_size_ew | 4    | 4    | 4    | 4    | 5    | 5    | 5     | 5     |
| extended_halo_size_ns | 5    | 7    | 7    | 8    | 8    | 8    | 10    | 10    |
| [namelist:nlstcgen]   |      |      |      |      |      |      |       |       |
| steps_per_periodim    | 72   | 96   | 120  | 120  | 144  | 192  | 288   | 360   |
| [namelist:run_dust]   |      |      |      |      |      |      |       |       |
| us_am                 | 1.45 | 1.40 | 1.40 | 1.40 | 1.40 | 1.40 | 1.40  | 1.40  |
| [namelist:run_gwd]    |      |      |      |      |      |      |       |       |
| ussp_launch_factor    | 1.3  | 1.2  | 1.2  | 1.2  | 1.2  | 1.2  | 1.2   | 1.2   |

Table 1: GA7.0 settings that vary with global horizontal resolution.

## 3 GA7.0 settings that vary with vertical resolution

### 3.1 UM settings to change with level set

Table 2 lists the UM settings (as set in the Rose suite applications) that should be changed when changing vertical resolution. The settings listed here are valid for UM code base vn10.6. Note that as discussed in the main paper, GA7.0 systems should only use either L85(50<sub>t</sub>,35<sub>s</sub>)<sub>85</sub>, L70(50<sub>t</sub>,20<sub>s</sub>)<sub>80</sub>, or L63(50<sub>t</sub>,13<sub>s</sub>)<sub>40</sub> level sets.

### 3.2 Details of vertical level sets

In the vertical, the UM uses the terrain-following height coordinate  $\eta$ , which is normalised to be  $\eta = 0$  at the lower boundary, and  $\eta = 1$  at a height  $z_T$ , the height of the fixed model lid. In between, the height above mean sea level at any given point,  $z$ , is defined by

$$z = \begin{cases} \eta z_T + h \left(1 - \frac{\eta}{\eta_I}\right)^2, & 0 \leq \eta \leq \eta_I; \\ \eta z_T, & \eta_I \leq \eta \leq z_T, \end{cases} \quad (1)$$

where  $h$  is the height of the model orography above the earth's mean radius and  $\eta_I$  is the level at and above which the levels are flat.

The namelists below detail the level sets used with GA7.0. In these namelists, the variable `z_top_of_model`= $z_T$  (in metres), `eta_theta` is the array of  $\eta$  values for the levels on which the prognostic potential temperature ( $\theta$ ) is held including the surface, `eta_rho` is the array of  $\eta$  values for the levels on which the prognostic density ( $\rho$ ) is held, and `first_constant_rho_level` is the  $\rho$ -level at which  $\eta = \eta_I$ .

| namelist<br>entry                                  | L85(50 <sub>t</sub> ,35 <sub>s</sub> ) <sub>85</sub> | L70(50 <sub>t</sub> ,20 <sub>s</sub> ) <sub>80</sub> | L63(50 <sub>t</sub> ,13 <sub>s</sub> ) <sub>40</sub> |
|----------------------------------------------------|------------------------------------------------------|------------------------------------------------------|------------------------------------------------------|
| [namelist:domain("All model level STASH domains")] |                                                      |                                                      |                                                      |
| levt                                               | 85                                                   | 70                                                   | 63                                                   |
| [namelist:nlsizes]                                 |                                                      |                                                      |                                                      |
| cloud_levels                                       | 85                                                   | 70                                                   | 63                                                   |
| model_levels                                       | 85                                                   | 70                                                   | 63                                                   |
| ozone_levels                                       | 85                                                   | 70                                                   | 63                                                   |
| [namelist:run_cloud]                               |                                                      |                                                      |                                                      |
| rhcrit(18:)                                        | 68*0.800                                             | 53*0.800                                             | 46*0.800                                             |
| [namelist:run_dyn]                                 |                                                      |                                                      |                                                      |
| eta_s                                              | 0.5                                                  | 0.5                                                  | 0.75                                                 |

Table 2: GA7.0 settings that vary with atmospheric vertical resolution. Note that whilst the PC2 cloud scheme now uses a diagnostic formulation for rhcrit ( $RH_{crit}$ ) as described in section 3.4 of the main paper, a prescribed  $RH_{crit}$  profile is still in the microphysics scheme to determine the in-cloud relative humidity.

### Level set L85(50<sub>t</sub>,35<sub>s</sub>)<sub>85</sub>

&VERTLEVS

z\_top\_of\_model = 85000.00,  
first\_constant\_r\_rho\_level= 51,  
eta\_theta=

|                |                |                |                |                |
|----------------|----------------|----------------|----------------|----------------|
| 0.0000000E+00, | 0.2352941E-03, | 0.6274510E-03, | 0.1176471E-02, | 0.1882353E-02, |
| 0.2745098E-02, | 0.3764706E-02, | 0.4941176E-02, | 0.6274510E-02, | 0.7764705E-02, |
| 0.9411764E-02, | 0.1121569E-01, | 0.1317647E-01, | 0.1529412E-01, | 0.1756863E-01, |
| 0.2000000E-01, | 0.2258823E-01, | 0.2533333E-01, | 0.2823529E-01, | 0.3129411E-01, |
| 0.3450980E-01, | 0.3788235E-01, | 0.4141176E-01, | 0.4509804E-01, | 0.4894118E-01, |
| 0.5294117E-01, | 0.5709804E-01, | 0.6141176E-01, | 0.6588235E-01, | 0.7050980E-01, |
| 0.7529411E-01, | 0.8023529E-01, | 0.8533333E-01, | 0.9058823E-01, | 0.9600001E-01, |
| 0.1015687E+00, | 0.1072942E+00, | 0.1131767E+00, | 0.1192161E+00, | 0.1254127E+00, |
| 0.1317666E+00, | 0.1382781E+00, | 0.1449476E+00, | 0.1517757E+00, | 0.1587633E+00, |
| 0.1659115E+00, | 0.1732221E+00, | 0.1806969E+00, | 0.1883390E+00, | 0.1961518E+00, |
| 0.2041400E+00, | 0.2123093E+00, | 0.2206671E+00, | 0.2292222E+00, | 0.2379856E+00, |
| 0.2469709E+00, | 0.2561942E+00, | 0.2656752E+00, | 0.2754372E+00, | 0.2855080E+00, |
| 0.2959203E+00, | 0.3067128E+00, | 0.3179307E+00, | 0.3296266E+00, | 0.3418615E+00, |
| 0.3547061E+00, | 0.3682416E+00, | 0.3825613E+00, | 0.3977717E+00, | 0.4139944E+00, |
| 0.4313675E+00, | 0.4500474E+00, | 0.4702109E+00, | 0.4920571E+00, | 0.5158098E+00, |
| 0.5417201E+00, | 0.5700686E+00, | 0.6011688E+00, | 0.6353697E+00, | 0.6730590E+00, |
| 0.7146671E+00, | 0.7606701E+00, | 0.8115944E+00, | 0.8680208E+00, | 0.9305884E+00, |
| 0.1000000E+01, |                |                |                |                |

eta\_rho=

|                |                |                |                |                |
|----------------|----------------|----------------|----------------|----------------|
| 0.1176471E-03, | 0.4313726E-03, | 0.9019608E-03, | 0.1529412E-02, | 0.2313725E-02, |
| 0.3254902E-02, | 0.4352941E-02, | 0.5607843E-02, | 0.7019607E-02, | 0.8588235E-02, |
| 0.1031373E-01, | 0.1219608E-01, | 0.1423529E-01, | 0.1643137E-01, | 0.1878431E-01, |
| 0.2129412E-01, | 0.2396078E-01, | 0.2678431E-01, | 0.2976470E-01, | 0.3290196E-01, |
| 0.3619608E-01, | 0.3964706E-01, | 0.4325490E-01, | 0.4701960E-01, | 0.5094118E-01, |
| 0.5501961E-01, | 0.5925490E-01, | 0.6364705E-01, | 0.6819607E-01, | 0.7290196E-01, |
| 0.7776470E-01, | 0.8278431E-01, | 0.8796078E-01, | 0.9329412E-01, | 0.9878433E-01, |
| 0.1044314E+00, | 0.1102354E+00, | 0.1161964E+00, | 0.1223144E+00, | 0.1285897E+00, |
| 0.1350224E+00, | 0.1416128E+00, | 0.1483616E+00, | 0.1552695E+00, | 0.1623374E+00, |
| 0.1695668E+00, | 0.1769595E+00, | 0.1845180E+00, | 0.1922454E+00, | 0.2001459E+00, |
| 0.2082247E+00, | 0.2164882E+00, | 0.2249446E+00, | 0.2336039E+00, | 0.2424783E+00, |
| 0.2515826E+00, | 0.2609347E+00, | 0.2705562E+00, | 0.2804726E+00, | 0.2907141E+00, |
| 0.3013166E+00, | 0.3123218E+00, | 0.3237787E+00, | 0.3357441E+00, | 0.3482838E+00, |
| 0.3614739E+00, | 0.3754014E+00, | 0.3901665E+00, | 0.4058831E+00, | 0.4226810E+00, |
| 0.4407075E+00, | 0.4601292E+00, | 0.4811340E+00, | 0.5039334E+00, | 0.5287649E+00, |

|                |                |                |                |                |
|----------------|----------------|----------------|----------------|----------------|
| 0.5558944E+00, | 0.5856187E+00, | 0.6182693E+00, | 0.6542144E+00, | 0.6938630E+00, |
| 0.7376686E+00, | 0.7861323E+00, | 0.8398075E+00, | 0.8993046E+00, | 0.9652942E+00, |

/

### Level set L70(50,20)<sub>s</sub>80

&VERTLEVS

```

z_top_of_model = 80000.0,
first_constant_r_rho_level= 50,
eta_theta=
.0000000, .0002500, .0006667, .0012500, .0020000,
.0029167, .0040000, .0052500, .0066667, .0082500,
.0100000, .0119167, .0140000, .0162500, .0186667,
.0212500, .0240000, .0269167, .0300000, .0332500,
.0366667, .0402500, .0440000, .0479167, .0520000,
.0562500, .0606667, .0652500, .0700000, .0749167,
.0800000, .0852500, .0906668, .0962505, .1020017,
.1079213, .1140113, .1202745, .1267154, .1333406,
.1401592, .1471838, .1544313, .1619238, .1696895,
.1777643, .1861929, .1950307, .2043451, .2142178,
.2247466, .2360480, .2482597, .2615432, .2760868,
.2921094, .3098631, .3296378, .3517651, .3766222,
.4046373, .4362943, .4721379, .5127798, .5589045,
.6112759, .6707432, .7382500, .8148403, .9016668,
1.0000000,
eta_rho=
.0001250, .0004583, .0009583, .0016250, .0024583,
.0034583, .0046250, .0059583, .0074583, .0091250,
.0109583, .0129583, .0151250, .0174583, .0199583,
.0226250, .0254583, .0284583, .0316250, .0349583,
.0384583, .0421250, .0459583, .0499583, .0541250,
.0584584, .0629583, .0676250, .0724583, .0774583,
.0826250, .0879584, .0934586, .0991261, .1049615,
.1109663, .1171429, .1234950, .1300280, .1367499,
.1436715, .1508076, .1581776, .1658067, .1737269,
.1819786, .1906118, .1996879, .2092815, .2194822,
.2303973, .2421538, .2549014, .2688150, .2840981,
.3009862, .3197505, .3407014, .3641936, .3906297,
.4204658, .4542161, .4924589, .5358422, .5850902,
.6410096, .7044966, .7765451, .8582535, .9508334,

```

/

### Level set L63(50,13)<sub>s</sub>40

&VERTLEVS

```

z_top_of_model = 41022.39,
first_constant_r_rho_level= 50,
eta_theta=
0.0000000E+00, 4.8753872E-04, 1.3001683E-03, 2.4376935E-03, 3.9003098E-03,
5.6880168E-03, 7.8006196E-03, 1.0238313E-02, 1.3001097E-02, 1.6088778E-02,
1.9501548E-02, 2.3239411E-02, 2.7302168E-02, 3.1690016E-02, 3.6402956E-02,
4.1440792E-02, 4.6803717E-02, 5.2491732E-02, 5.8504645E-02, 6.4842649E-02,
7.1505740E-02, 7.8493737E-02, 8.5806817E-02, 9.3444988E-02, 1.0140806E-01,
1.0969621E-01, 1.1830946E-01, 1.2724760E-01, 1.3651083E-01, 1.4609917E-01,
1.5601239E-01, 1.6625071E-01, 1.7681430E-01, 1.8770337E-01, 1.9891910E-01,
2.1046326E-01, 2.2233970E-01, 2.3455390E-01, 2.4711467E-01, 2.6003483E-01,
2.7333215E-01, 2.8703120E-01, 3.0116495E-01, 3.1577647E-01, 3.3092082E-01,
3.4666792E-01, 3.6310497E-01, 3.8034007E-01, 3.9850461E-01, 4.1775790E-01,
4.3829069E-01, 4.6033016E-01, 4.8414484E-01, 5.1004976E-01, 5.3841203E-01,
5.6965858E-01, 6.0428101E-01, 6.4284474E-01, 6.8599641E-01, 7.3447162E-01,
7.8910542E-01, 8.5084140E-01, 9.2074203E-01, 1.0000000E+00,
eta_rho=
2.4376936E-04, 8.9375599E-04, 1.8688334E-03, 3.1690018E-03, 4.7940658E-03,
6.7442209E-03, 9.0194661E-03, 1.1619608E-02, 1.4544840E-02, 1.7795164E-02,

```

2.1370383E-02, 2.5270693E-02, 2.9496092E-02, 3.4046389E-02, 3.8921777E-02,  
 4.4122253E-02, 4.9647629E-02, 5.5498090E-02, 6.1673649E-02, 6.8174094E-02,  
 7.4999638E-02, 8.2150280E-02, 8.9625798E-02, 9.7426422E-02, 1.0555213E-01,  
 1.1400293E-01, 1.2277844E-01, 1.3187923E-01, 1.4130490E-01, 1.5105568E-01,  
 1.6113155E-01, 1.7153251E-01, 1.8225874E-01, 1.9331124E-01, 2.0469119E-01,  
 2.1640146E-01, 2.2844680E-01, 2.4083437E-01, 2.5357473E-01, 2.6668346E-01,  
 2.8018168E-01, 2.9409820E-01, 3.0847082E-01, 3.2334876E-01, 3.3879438E-01,  
 3.5488644E-01, 3.7172252E-01, 3.8942233E-01, 4.0813133E-01, 4.2802429E-01,  
 4.4931039E-01, 4.7223738E-01, 4.9709725E-01, 5.2423090E-01, 5.5403531E-01,  
 5.8696973E-01, 6.2356299E-01, 6.6442049E-01, 7.1023387E-01, 7.6178843E-01,  
 8.1997347E-01, 8.8579178E-01, 9.6037108E-01,

## 4 Namelist differences between GA7.0 and GA7.1

Section 5 of the main paper describes the GA7.1 “branch” configuration that will be used in climate models submitted to CMIP6, which includes a number of scientific differences from the GA7.0 “trunk” configuration. Table 3 lists the UM settings (as set in the Rose suite applications) that should be changed when changing from GA7.0 to GA7.1. The settings listed here are valid for UM code base vn10.6.

| namelist<br>entry         | GA7.0                   | GA7.1                   |
|---------------------------|-------------------------|-------------------------|
| [namelist:run_bl]         |                         |                         |
| l_conv_tke                | .false.                 | .true.                  |
| [namelist:run_convection] |                         |                         |
| cca_sh_knob               | 0.2                     | 0.5                     |
| [namelist:run_precip]     |                         |                         |
| mp_dz_scal                | 1.0                     | 2.0                     |
| [namelist:run_radiation]  |                         |                         |
| l_use_liu_spec            | .false.                 | .true.                  |
| [namelist:run_ukca]       |                         |                         |
| l_ukca_scale_seadms_ems   | .false.                 | .true.                  |
| seadms_ems_scaling        | 1.0                     | 1.7                     |
| ukcaaclw                  | ga3-7/nml_ac_lw         | ga7_1/nml_ac_lw         |
| ukcaacsw                  | ga3-7/nml_ac_sw         | ga7_1/nml_ac_sw         |
| ukcaanlw                  | ga3-7/nml_an_lw         | ga7_1/nml_an_lw         |
| ukcaansw                  | ga3-7/nml_an_sw         | ga7_1/nml_an_sw         |
| ukcacrlw                  | ga3-7/nml_cr_lw         | ga7_1/nml_cr_lw         |
| ukcacrsw                  | ga3-7/nml_cr_sw         | ga7_1/nml_cr_sw         |
| ukcaprec                  | ga3-7/RADAER_pcalc.ukca | ga7_1/RADAER_pcalc.ukca |

Table 3: UM settings that differ between GA7.0 and GA7.1. Note that where there are different ancillaries used, these are specified through an ancil\_versions file, so require no specific changes to the UM Rose app.

## 5 Settings that may vary with system/application

As described in the main paper, GA7.0/GL7.0 (or GA7.1/GL7.0) defines the scientific configuration of the UM and JULES components used in various systems. In addition to the differences with horizontal and vertical resolution described above — and the scientific differences between GA7.0 and GA7.1 — there are some settings that may be seen as system dependent, which we

illustrate in this section. In Table 4 we illustrate an example of the systems settings that vary between deterministic global NWP and climate research configurations of GA7.0/G7.0. Note that this is just a description of the scientific differences rather than a full list of technical options/namelist entries that would need to be changed to apply these changes.

| Area of the model                      |                  |                         |
|----------------------------------------|------------------|-------------------------|
| Scientific option                      | NWP              | Climate                 |
| Time dependent options                 |                  |                         |
| Calendar type                          | Gregorian        | 360 day*                |
| Method for calculating global sums     |                  |                         |
| Summation type                         | Non-reproducible | Double-double precision |
| Definition of land/sea                 |                  |                         |
| Use of “coastal tiling”                | Off              | On                      |
| Global conservation options            |                  |                         |
| Conservative moisture/tracer advection | Off              | On                      |
| Enforced energy conservation           | Off              | On                      |
| Aerosol modelling                      |                  |                         |
| Prognostic/climatological aerosol      | Climatological** | Prognostic              |

Table 4: A descriptive example of GA7.0 settings that might vary with system/application.

\*Note that the 360 day calendar is not compulsory for GA7.0 climate jobs, but is still used in most standard jobs. \*\* As discussed in the main paper, the aerosol definition is dependent on the system. Most climate runs use full UKCA Glomap-mode prognostic aerosols with prescribed gas phase precursors. Runs on Seasonal timescales or shorter use CLASSIC aerosol climatologies, although in time we would like to replace these with Glomap-mode climatologies. Finally, we now usually include prognostic mineral dust forecasting and assimilation on NWP timescales.
